# Supplementary material for: The association between short-term response and long-term survival for cervical cancer patients undergoing neoadjuvant chemotherapy: a system review and meta-analysis
Source: PubMed Central journal article supplement (PMC5784110; doi:10.1038/s41598-018-19948-0), 2018-01-24
Supplement: 41598_2018_19948_MOESM1_ESM.pdf [file 41598_2018_19948_MOESM1_ESM.pdf]

1 **The association between short-term response and long-term survival for cervical cancer**  
2 **patients undergoing neoadjuvant chemotherapy: a system review and meta-analysis**

3

4 Shi-yi Kong\*, Kecheng Huang\*, Chao Zeng, Xiangyi Ma# & Shixuan Wang#

5

6

7 Supplementary Fig. S1. Title: Begg's and Egger's publication bias plot for HR of 1-year OS.

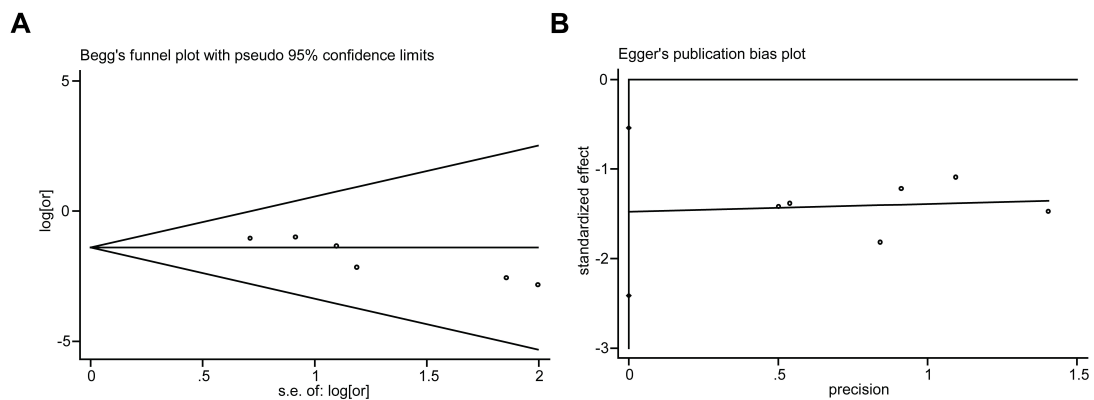

8

9 Legend: (A) The pseudo 95% confidence interval (CI) is computed as part of the analysis that  
10 produces the funnel plot, and corresponding to the expected 95% CI for a given standard error  
11 (SE) ( $P = 0.02$ ). (B) Publication bias can be concluded by intercept as well as p-value ( $P =$   
12  $0.01$ ). HR indicates hazard ratio.

13

14

15

16 Supplementary Fig. S2. Title: Sensitivity analysis for testing the robust of HR of 1-year OS.

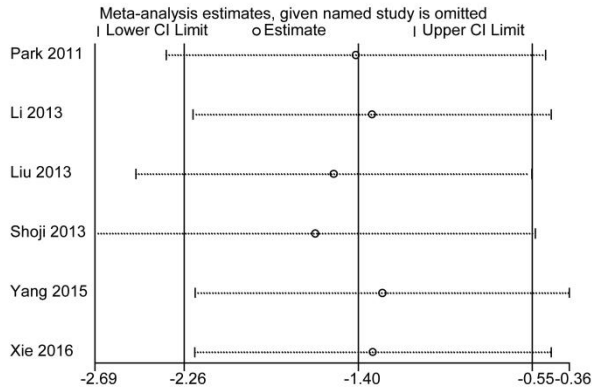

17

18 Legend: The small circle indicates the estimated logHR, given the named study is omitted.

19 Accordingly, the bar is corresponding to the lower limit of 95% CI of the logHR. The Figure  
20 indicates that the result is robust.

21

22

23

24 Supplementary Fig. S3. Title: Begg's and Egger's publication bias plot for HR of 2-year OS.

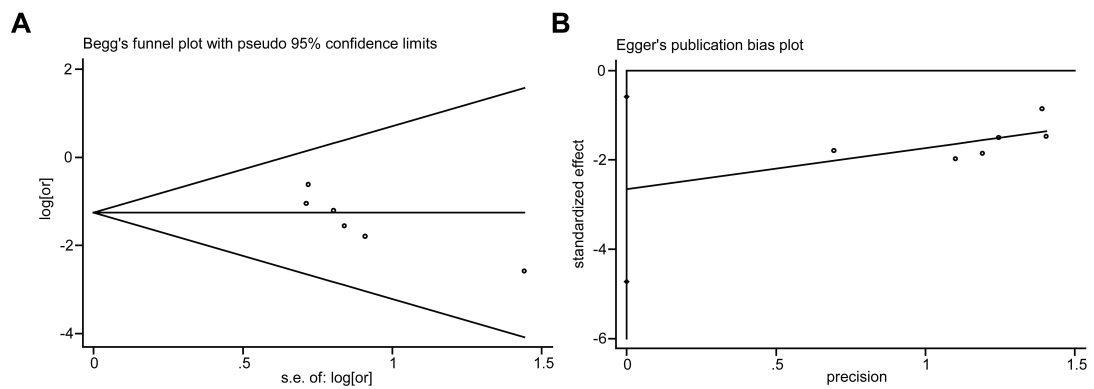

25

26 Legend: (A) The pseudo 95% confidence interval (CI) is computed as part of the analysis that

27 produces the funnel plot, and corresponding to the expected 95% CI for a given standard error

28 (SE) ( $P = 0.02$ ). (B) Publication bias can be concluded by intercept as well as p-value ( $P =$

29  $0.02$ ). HR indicates hazard ratio.

30

31

32

33 Supplementary Fig. S4. Title: Sensitivity analysis for testing the robust of HR of 2-year OS.

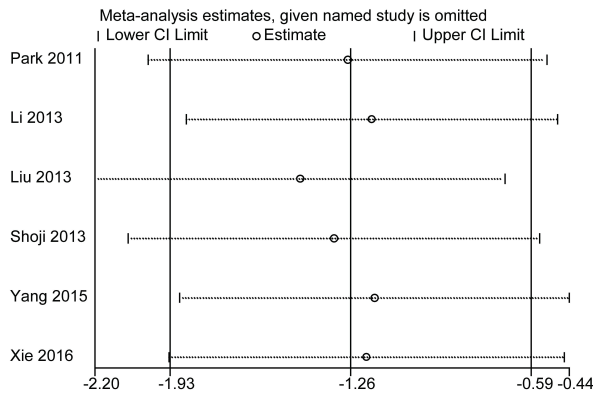

34

35 Legend: The small circle indicates the estimated logHR, given the named study is omitted.

36 Accordingly, the bar is corresponding to the lower limit of 95% CI of the logHR. The Figure  
37 indicates that the result is robust.

38

39

40

41 Supplementary Fig. S5. Title: Begg's and Egger's publication bias plot for HR of 3-year OS.

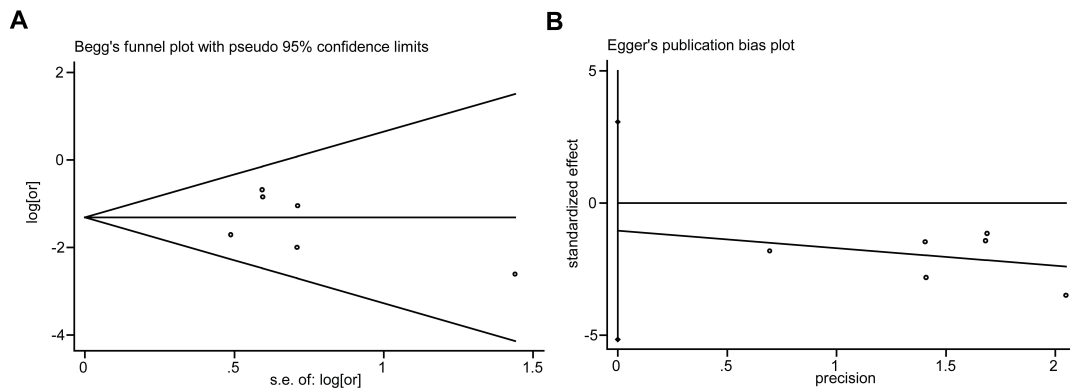

42

43 Legend: (A) The pseudo 95% confidence interval (CI) is computed as part of the analysis that  
44 produces the funnel plot, and corresponding to the expected 95% CI for a given standard error  
45 (SE) ( $P = 0.71$ ). (B) Publication bias can be concluded by intercept as well as p-value. The  
46 test showed that no obvious publication bias was observed with  $P = 0.52$ . HR indicates hazard  
47 ratio.

48

49

50

51 Supplementary Fig. S6. Title: Sensitivity analysis for testing the robust of HR of 3-year OS.

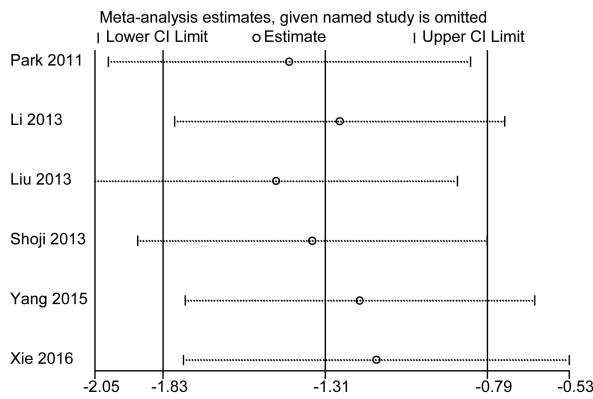

52

53 Legend: The small circle indicates the estimated logHR, given the named study is omitted.

54 Accordingly, the bar is corresponding to the lower limit of 95% CI of the logHR. The Figure

55 indicates that the result is robust.

56

57

58

59 Supplementary Fig. S7. Title: Begg's and Egger's publication bias plot for HR of 4-year OS.

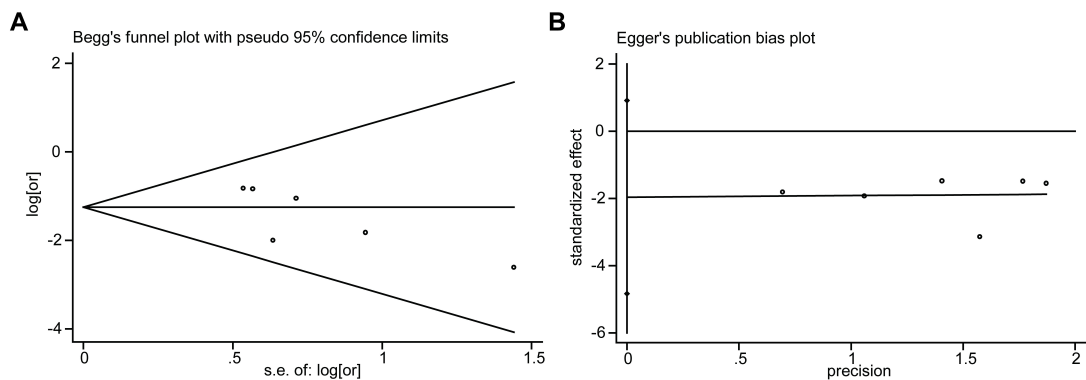

60

61 Legend: (A) The pseudo 95% confidence interval (CI) is computed as part of the analysis that

62 produces the funnel plot, and corresponding to the expected 95% CI for a given standard error

63 (SE) ( $P = 0.13$ ). (B) Publication bias can be concluded by intercept as well as p-value. The

64 test showed that no obvious publication bias was observed with  $P = 0.13$ . HR indicates hazard

65 ratio.

66

67

68

69 Supplementary Fig. S8. Title: Sensitivity analysis for testing the robust of HR of 4-year OS.

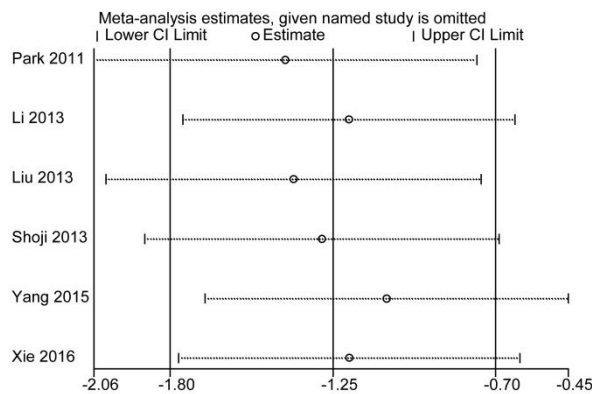

70

71 Legend: The small circle indicates the estimated logHR, given the named study is omitted.

72 Accordingly, the bar is corresponding to the lower limit of 95% CI of the logHR. The Figure

73 indicates that the result is robust.

74

75

76

77 Supplementary Fig. S9. Title: Begg's and Egger's publication bias plot for HR of 5-year OS.

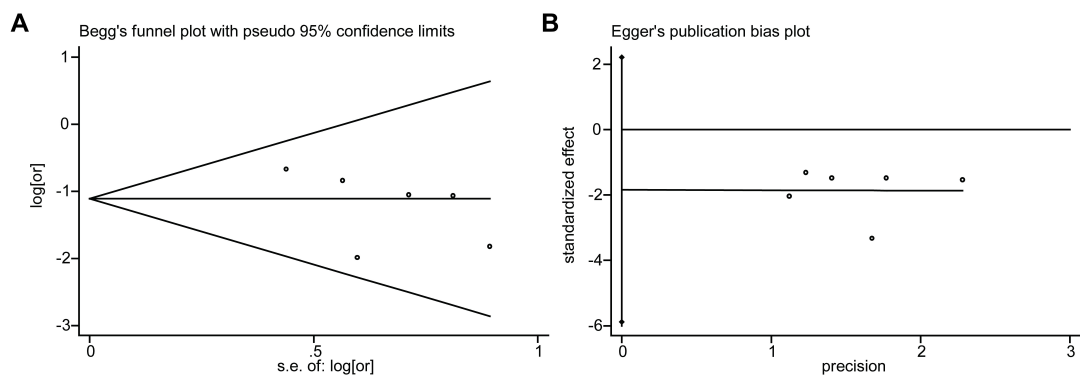

78

79 Legend: (A) The pseudo 95% confidence interval (CI) is computed as part of the analysis that

80 produces the funnel plot, and corresponding to the expected 95% CI for a given standard error

81 (SE) ( $P = 0.13$ ). (B) Publication bias can be concluded by intercept as well as p-value. The

82 test showed that no obvious publication bias was observed with  $P = 0.28$ . HR indicates hazard

83 ratio.

84

85

86

87 Supplementary Fig. S10. Title: Sensitivity analysis for testing the robust of HR of 5-year OS.

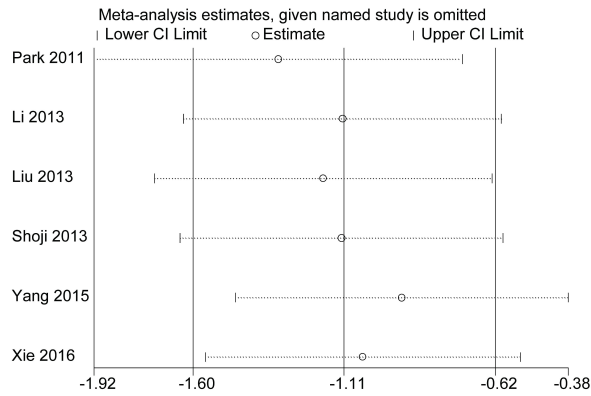

88

89 Legend: The small circle indicates the estimated logHR, given the named study is omitted.

90 Accordingly, the bar is corresponding to the lower limit of 95% CI of the logHR. The Figure

91 indicates that the result is robust.
